# Supplementary material
Source: Springer Nature journal article supplement (https://www.springermedizin.de/resource/supplementary/12891_2009_721_MOESM2_ESM.pdf/9506258)

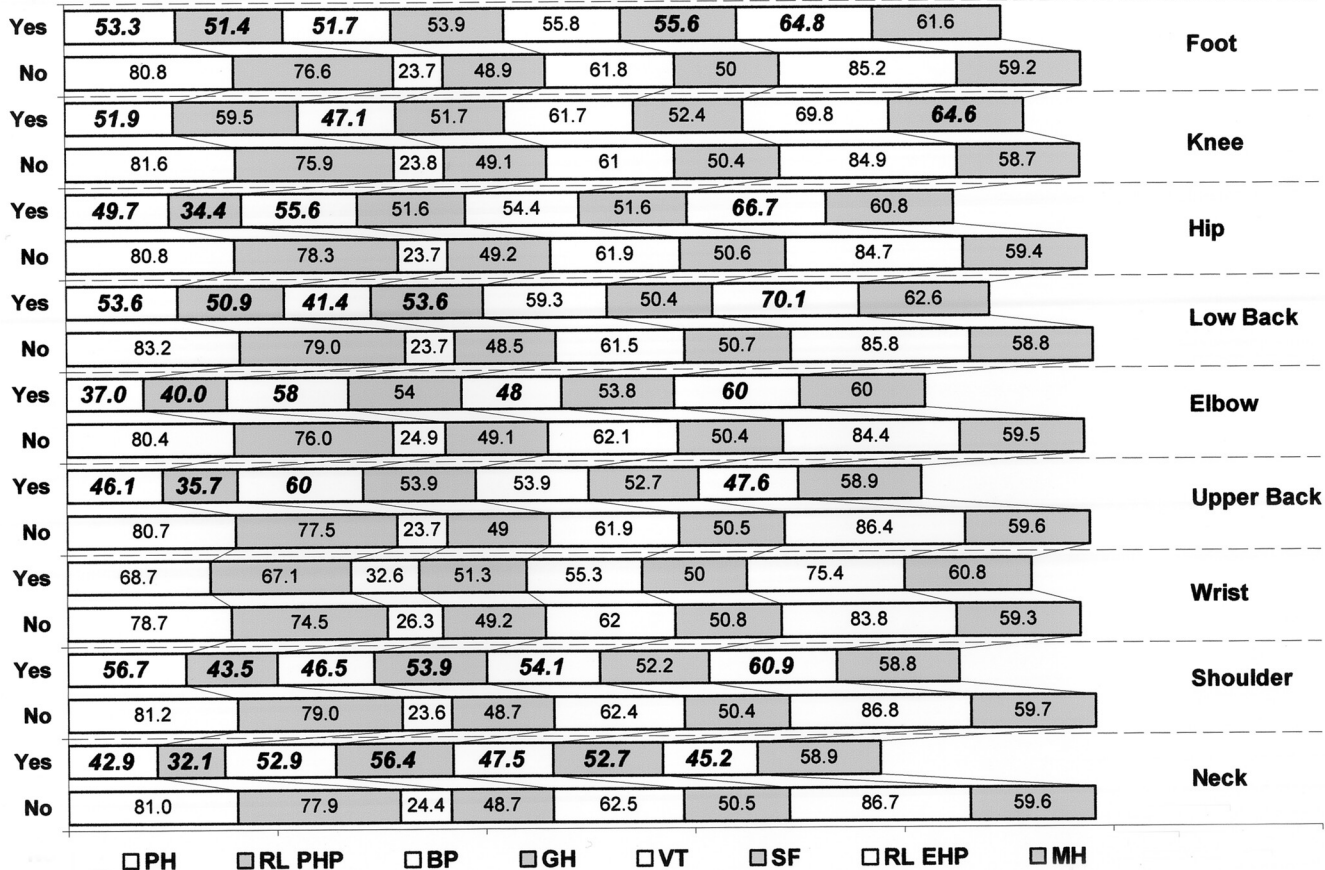

□ PH

□ RL PHP

□ BP

□ GH

□ VT

□ SF

□ RL EHP

□ MH

Supplement: MOESM2 [file 9506258]
